# Supplementary material for: Dy@D2(21)-C84: isolation and crystallographic characterization of a rare trivalent C84-based monometallofullerene
Source: Royal Society of Chemistry journal article supplement (doi:10.1039/d3qi00469d), 2023-01-01
Supplement: d3qi00469d1.pdf [file d3qi00469d1.pdf]

# Electronic supplementary information for **Dy@D<sub>2</sub>(21)-C<sub>84</sub>: Isolation and crystallographic characterization of a rare trivalent C<sub>84</sub>-based monometallofullerene**

Wangqiang Shen,<sup>\*a</sup> Lei Lou,<sup>b</sup> Yiao Wei,<sup>c</sup> Lipiao Bao,<sup>c</sup> Guangqing Xu,<sup>a</sup> Peng Jin,<sup>\*b</sup> Jun Lv<sup>\*a</sup> and  
Xing Lu<sup>\*c</sup>

<sup>a</sup> School of Materials Science and Engineering, Hefei University of Technology, Hefei 230009, P. R.  
China

<sup>b</sup> School of Materials Science and Engineering, Hebei University of Technology, Tianjin 300130, P. R.  
China

<sup>c</sup> School of Materials Science and Engineering, Huazhong University of Science and Technology,  
Wuhan 430074, P. R. China

## Table of Contents

### Experimental details

**Figure S1.** Isolation of raw soot extract on a Buckyprep column.

**Scheme S1.** The process of separation of Dy-EMFs from F-5 with SnCl<sub>4</sub>.

**Figure S2.** Isolation schemes of Dy@D<sub>2</sub>(21)-C<sub>84</sub>.

**Table S1.** Details of the vis-NIR absorptions of Dy@D<sub>2</sub>(21)-C<sub>84</sub>.

**Table S2.** Crystallographic Data of Dy@D<sub>2</sub>(21)-C<sub>84</sub>.

**Figure S3.** Positions of the disordered dysprosium sites in Dy@D<sub>2</sub>(21)-C<sub>84</sub>.

**Table S3.** The fractional occupancies of the disordered dysprosium sites in Dy@D<sub>2</sub>(21)-C<sub>84</sub>.

**Table S4.** Relative energies of low-lying Dy@C<sub>84</sub> isomers with different spin multiplicities.

**Figure S4.** Occupied f-type localized molecular orbitals of Dy@D<sub>2</sub>(21)-C<sub>84</sub> and U@D<sub>2</sub>(21)-  
C<sub>84</sub>.

**Figure S5.** Spin density distribution of Dy@D<sub>2</sub>(21)-C<sub>84</sub> with spin population values for the Dy  
atom.

**Figure S6.** Orbital interaction diagram of Dy@D<sub>2</sub>(21)-C<sub>84</sub>.

**Figure S7.** Optimized structures and encapsulation energies (kcal/mol) of M@C<sub>84</sub> (M = Sm,  
Eu, U).

**Table S5.** Relative energies of M@C<sub>84</sub> with different spin multiplicities (M).

## References.

### Experimental details

**General characterizations.** High-performance liquid chromatography (HPLC) was conducted on an LC-908 machine (Japan Analytical Industry Co., Ltd.) with toluene as mobile phase. Matrix-assisted laser desorption ionization time of flight (LDI-TOF) mass spectrometry was measured on a BIFLEX III spectrometer (Bruker Daltonics Inc., Germany). Vis-NIR absorption spectra were measured on a PE Lambda 750S spectrophotometer (PerkinElmer, US) in CS<sub>2</sub>. Cyclic voltammograms (CV) was measured in o-dichlorobenzene on a CHI-660E workstation, with 0.05 M TBAPF<sub>6</sub> as supporting electrolyte. A three-electrode cell consisting of a Pt counter electrode, a glassy carbon working electrode, and a silver reference electrode was used for each CV measurement.

**Synthesis and isolation of Dy@D<sub>2</sub>(21)-C<sub>84</sub>.** Dy@D<sub>2</sub>(21)-C<sub>84</sub> was synthesized in a modified Krätschmer–Huffman fullerene generator by vaporizing composite graphite rods ( $\Phi 8 \times 100$  mm) containing a mixture of Dy<sub>2</sub>O<sub>3</sub> and graphite powder (molar ratio of Dy/C = 1:12) with the addition of 300 mbar He gas. After synthesis, the raw soot was collected and extracted by using CS<sub>2</sub>, then the solvent was removed by using a rotary evaporator. The solid was redissolved in toluene, the solution was filtered, and then subjected to HPLC separations. The crude extraction was injected into a Buckyprep column with toluene as eluent, fraction F-5 was collected in 55-61 min (**Figure S1**). Subsequently, fraction F-5 was treated with SnCl<sub>4</sub> which led to the rapid enrichment of SnCl<sub>4</sub>-EMF complexes as precipitate, which easily decompose to provide pure Dy-containing EMF powders by a simple water treatment [S1,S2]. The powders were dissolved in a CS<sub>2</sub> solution, the solution was dried by a rotary evaporator, and the obtained solid residue was dissolved in toluene and filtered to get the clear solution containing Dy-containing EMF (as shown in **Scheme S1**). F-5p was separated through a two-step HPLC separation with toluene as eluent. The first step was performed on a Buckyprep-M column, and fraction F-5p-3 was collected in 32-35 min (**Figure S2a**). Then, fraction F-5p-3 was reinjected into a Buckyprep column for recycling separation, and F-5p-3-1 (Dy@C<sub>84</sub>) was collected in 119-137 min (**Figure S2b**).

**Single-Crystal XRD measurements of Dy@D<sub>2</sub>(21)-C<sub>84</sub>.** Crystalline block of Dy@D<sub>2</sub>(21)-C<sub>84</sub> was obtained by layering a benzene solution of Ni<sup>II</sup>(OEP) over a CS<sub>2</sub> solution of Dy@C<sub>84</sub> in a glass tube. Over a 20-day period, the two solutions diffused together, and black crystals formed. Single-crystal

XRD measurement of Dy@D<sub>2</sub>(21)-C<sub>84</sub> was performed at 100 K at BL17B station of Shanghai Synchrotron Radiation Facility. The multi-scan method was used for absorption corrections. The structure was solved by direct method and were refined with SHELXL-2014/7 [S3]. CCDC-2246929 contains the supplementary crystallographic data for this paper. Details of the structural refinement can be found in **Table S2**.

**Computational details.** Density functional theory calculations were carried out by using the M06-2X[S4] functional in conjunction with the 6-31G\* basis set for C[S5] and SDD basis set and corresponding effective core potential for metals[S6] (denoted as 6-31G\*~SDD), as implemented in the Gaussian 16 software package[S7].

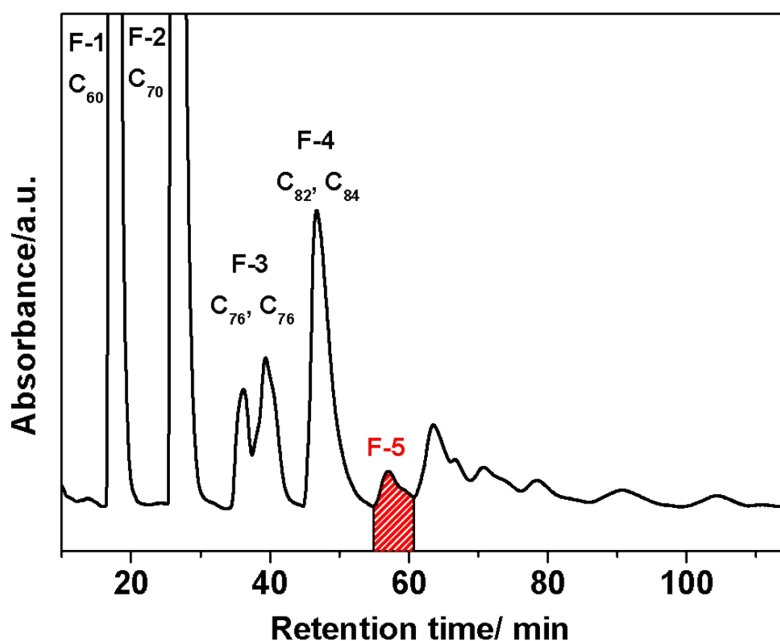

**Figure S1.** Isolation of raw soot extract on a Buckyprep column. Conditions:  $\Phi = 20 \text{ mm} \times 250 \text{ mm}$ , eluent = toluene, flow rate = 9.99 mL/min, detection wavelength = 330 nm, room temperature.

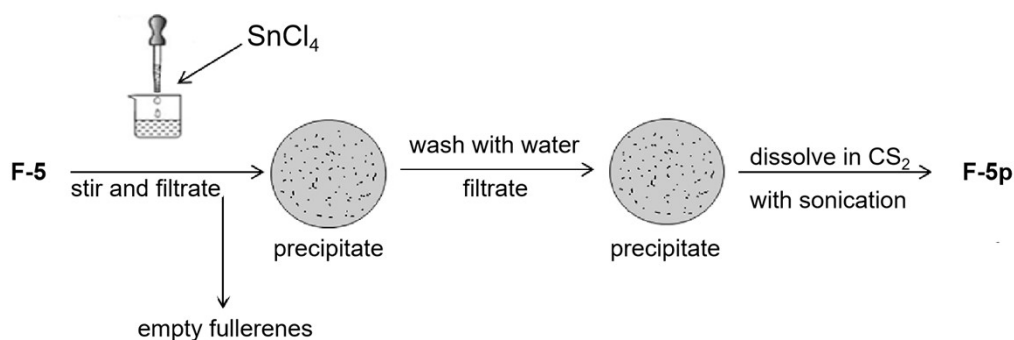

**Scheme S1.** The process of separation of Dy-EMFs from F-5 with  $\text{SnCl}_4$ .

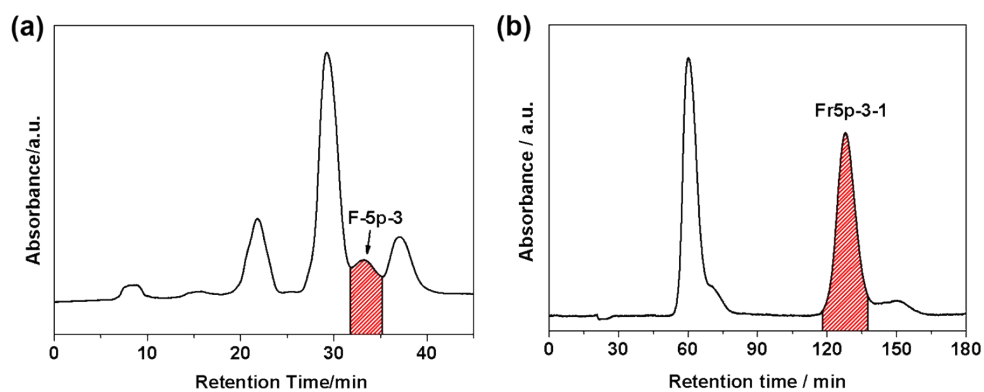

**Figure S2.** Isolation schemes of  $\text{Dy}@D_2(21)\text{-C}_{84}$ . HPLC chromatograms of (a) F-5p-1 obtained by a Buckyrep-M column and (b) F-5p-3-1 ( $\text{Dy}@D_2(21)\text{-C}_{84}$ ) obtained by a Buckyrep column. Conditions:  $\Phi = 20 \text{ mm} \times 250 \text{ mm}$ , eluent = toluene, flow rate =  $9.99 \text{ mL/min}$ , detection wavelength =  $330 \text{ nm}$ , room temperature.

**Table S1.** Details of the vis-NIR absorptions of  $\text{Dy}@D_2(21)\text{-C}_{84}$ .

| Compound                          | Vis-NIR absorption bands (nm) | Onset (nm) | Optical Bandgap (eV) <sup>a</sup> |
|-----------------------------------|-------------------------------|------------|-----------------------------------|
| $\text{Dy}@D_2(21)\text{-C}_{84}$ | 593, 646, 773, 836, 959       | 1485       | 0.84                              |

<sup>a</sup> Optical Bandgap (eV)  $\approx 1240/\text{onset (nm)}$ .

**Table S2.** Crystallographic Data of Dy@D<sub>2</sub>(21)-C<sub>84</sub>.

| Compound                      | Dy@D <sub>2</sub> (21)-C <sub>84</sub> •Ni <sup>II</sup> (OEP)•1.5(C <sub>6</sub> H <sub>6</sub> ) |
|-------------------------------|----------------------------------------------------------------------------------------------------|
| T, K                          | 100(2)                                                                                             |
| λ, Å                          | 0.6525                                                                                             |
| color/habit                   | black / block                                                                                      |
| Empirical formula             | C <sub>258</sub> H <sub>106</sub> Dy <sub>2</sub> N <sub>8</sub> Ni <sub>2</sub>                   |
| fw                            | 3759.86                                                                                            |
| crystal system                | monoclinic                                                                                         |
| space group                   | C2/m                                                                                               |
| a, Å                          | 27.054(1)                                                                                          |
| b, Å                          | 17.051(6)                                                                                          |
| c, Å                          | 17.770(6)                                                                                          |
| α, deg                        | 90.000                                                                                             |
| β, deg                        | 106.784(1)                                                                                         |
| γ, deg                        | 90.000                                                                                             |
| V, Å <sup>3</sup>             | 7848.0(5)                                                                                          |
| ρ, g/cm <sup>3</sup>          | 1.591                                                                                              |
| μ, mm <sup>-1</sup>           | 0.996                                                                                              |
| R1 [reflections with I>2σ(I)] | 0.1726                                                                                             |
| wR2 (all data)                | 0.3735                                                                                             |

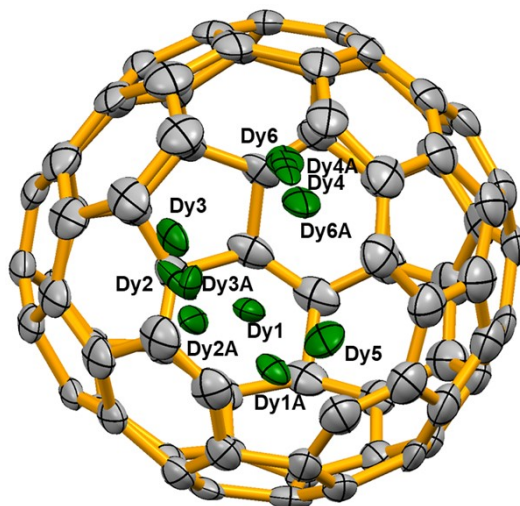**Figure S3.** Positions of the disordered dysprosium sites in Dy@D<sub>2</sub>(21)-C<sub>84</sub>. Atoms labeled with an “A” are generated by crystallographic operation.

**Table S3.** The fractional occupancies of the disordered dysprosium sites in Dy@D<sub>2</sub>(21)-C<sub>84</sub>.

| EMFs                                   | Fractional occupancy of the Dy positions |          |          |          |       |          |
|----------------------------------------|------------------------------------------|----------|----------|----------|-------|----------|
|                                        | Dy1/Dy1A                                 | Dy2/Dy2A | Dy3/Dy3A | Dy4/Dy4A | Dy5   | Dy6/Dy6A |
| Dy@D <sub>2</sub> (21)-C <sub>84</sub> | 0.144                                    | 0.122    | 0.085    | 0.081    | 0.066 | 0.035    |

The atom with a suffix 'A' is generated by crystallographic operation.

**Table S4.** Relative energies of low-lying Dy@C<sub>84</sub> isomers with different spin multiplicities (*M*). The ground state for each isomer is highlighted in bold.

| isomer                                  | <i>M</i> | $\Delta E$ (kcal/mol) |
|-----------------------------------------|----------|-----------------------|
| Dy@C <sub>2</sub> (13)-C <sub>84</sub>  | 5        | 0.8                   |
|                                         | 7        | <b>0.0</b>            |
| Dy@D <sub>2</sub> (21)-C <sub>84</sub>  | 5        | 53.0                  |
|                                         | 7        | <b>1.7</b>            |
| Dy@D <sub>3d</sub> (19)-C <sub>84</sub> | 5        | 34.2                  |
|                                         | 7        | <b>2.4</b>            |
| Dy@C <sub>1</sub> (12)-C <sub>84</sub>  | 5        | <b>4.0</b>            |
|                                         | 7        | 4.7                   |
| Dy@C <sub>2v</sub> (17)-C <sub>84</sub> | 5        | <b>6.3</b>            |
|                                         | 7        | 7.9                   |
| Dy@C <sub>s</sub> (10)-C <sub>84</sub>  | 5        | <b>8.7</b>            |
|                                         | 7        | 9.1                   |
| Dy@D <sub>2</sub> (22)-C <sub>84</sub>  | 5        | 22.5                  |
|                                         | 7        | <b>9.4</b>            |
| Dy@C <sub>2</sub> (9)-C <sub>84</sub>   | 5        | 9.9                   |
|                                         | 7        | <b>9.9</b>            |
| Dy@C <sub>2v</sub> (7)-C <sub>84</sub>  | 5        | 28.1                  |
|                                         | 7        | <b>16.1</b>           |
| Dy@C <sub>2</sub> (11)-C <sub>84</sub>  | 5        | 21.6                  |
|                                         | 7        | <b>16.2</b>           |
| Dy@D <sub>2d</sub> (23)-C <sub>84</sub> | 5        | <b>16.3</b>           |
|                                         | 7        | 20.8                  |
| Dy@C <sub>2</sub> (8)-C <sub>84</sub>   | 5        | <b>19.2</b>           |
|                                         | 7        | 19.7                  |
| Dy@C <sub>2</sub> (15)-C <sub>84</sub>  | 5        | <b>23.5</b>           |
|                                         | 7        | 27.5                  |
| Dy@C <sub>2</sub> (16)-C <sub>84</sub>  | 5        | 69.3                  |
|                                         | 7        | <b>29.0</b>           |

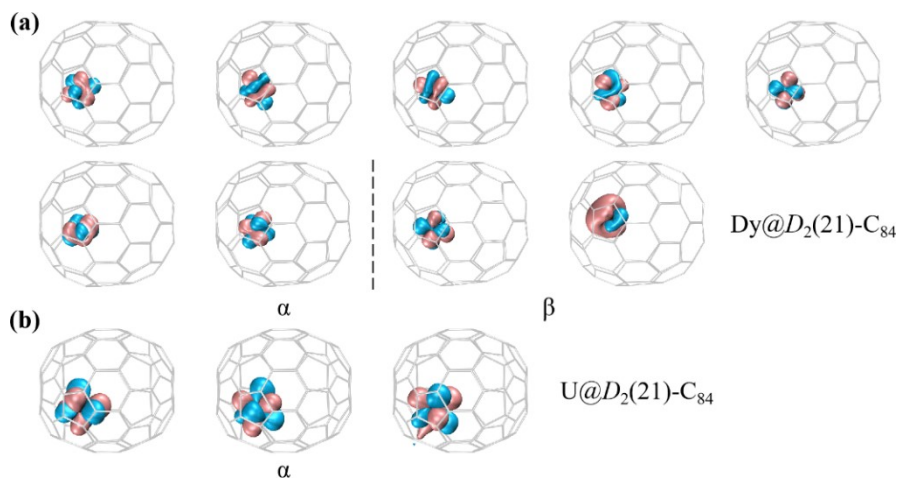

**Figure S4.** Occupied f-type localized molecular orbitals of (a)  $\text{Dy}@D_2(21)\text{-C}_{84}$  and (b)  $\text{U}@D_2(21)\text{-C}_{84}$ .

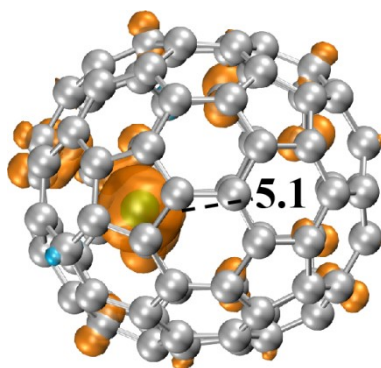

**Figure S5.** Spin density distribution of  $\text{Dy}@D_2(21)\text{-C}_{84}$  (isovalue:  $\pm 0.003$  au) with spin population values for the Dy atom.

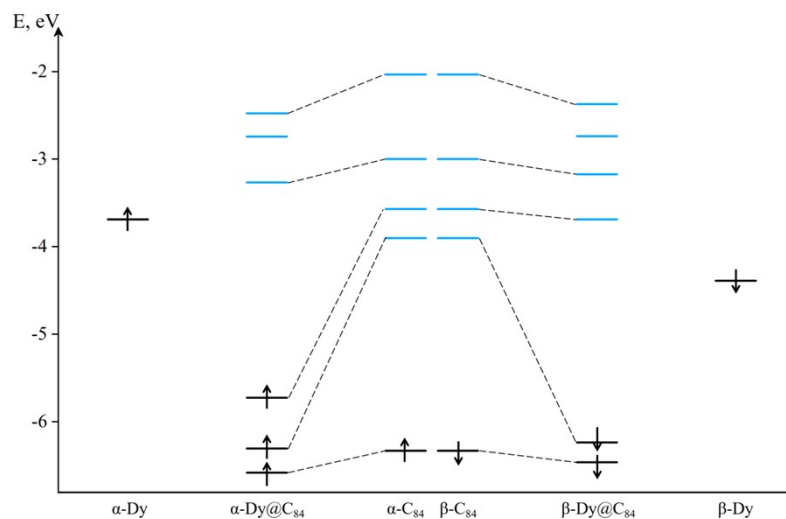

**Figure S6.** Orbital interaction diagram of  $\text{Dy}@D_2(21)\text{-C}_{84}$ . Occupied and unoccupied orbitals are denoted by black and blue lines, respectively. Three  $\alpha/\beta$  LUMOs of  $\text{C}_{84}$  contribute to the HOMOs of  $\text{Dy}@D_2(21)\text{-C}_{84}$ , thus confirming the acceptance of three electrons from the Dy atom.

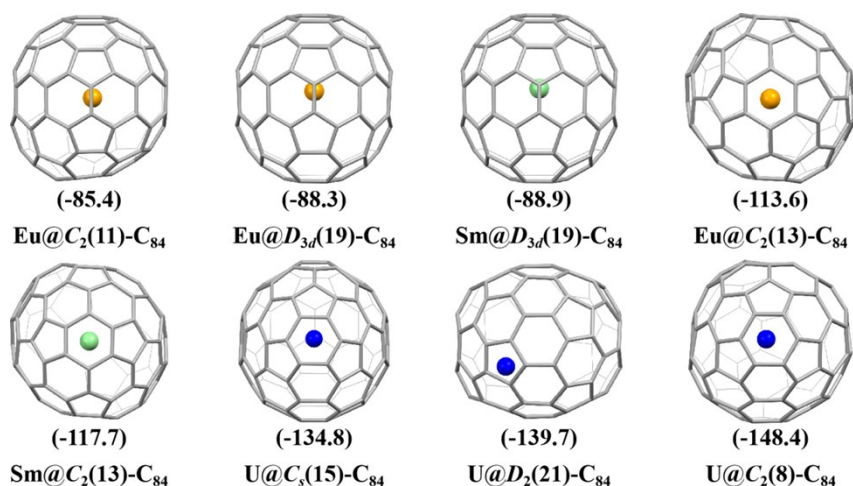

**Figure S7.** Optimized structures and encapsulation energies (kcal/mol) of  $M@C_{84}$  ( $M = \text{Sm}, \text{Eu}, \text{U}$ ). C: gray, Sm: light green, Eu: orange, U: blue.

**Table S5.** Relative energies of  $M@C_{84}$  with different spin multiplicities ( $M$ ) at the M06-2X/6-31G\*~SDD level of theory. The ground state for each molecule is highlighted in bold.

| Species                       | $M$      | $\Delta E$ (kcal/mol) |
|-------------------------------|----------|-----------------------|
| $\text{Eu}@C_2(11)-C_{84}$    | 6        | 15.9                  |
|                               | <b>8</b> | <b>0.0</b>            |
|                               | 10       | 16.3                  |
| $\text{Eu}@D_{3d}(19)-C_{84}$ | 6        | 24.3                  |
|                               | <b>8</b> | <b>0.0</b>            |
|                               | 10       | 18.2                  |
| $\text{Sm}@D_{3d}(19)-C_{84}$ | 5        | 14.9                  |
|                               | <b>7</b> | <b>0.0</b>            |
|                               | 9        | 15.0                  |
| $\text{Eu}@C_2(13)-C_{84}$    | 6        | 100.0                 |
|                               | <b>8</b> | <b>0.0</b>            |
|                               | 10       | 29.7                  |
| $\text{Sm}@C_2(13)-C_{84}$    | 5        | 78.7                  |
|                               | <b>7</b> | <b>0.0</b>            |
|                               | 9        | 33.8                  |
| $\text{U}@C_s(15)-C_{84}$     | <b>3</b> | <b>0.0</b>            |
|                               | 5        | 5.3                   |
| $\text{U}@D_2(21)-C_{84}$     | 3        | 10.8                  |
|                               | <b>5</b> | <b>0.0</b>            |
| $\text{U}@C_2(8)-C_{84}$      | <b>3</b> | <b>0.0</b>            |
|                               | 5        | 2.1                   |

## References

[S1] C. Pan, L. Bao, X. Yu, H. Fang, Y. Xie, T. Akasaka, X. Lu, Facile Access to  $\text{Y}_2\text{C}_{2n}$  ( $2n = 92-$



- 130) and Crystallographic Characterization of  $Y_2C_2@C_1(1660)-C_{108}$ : A Giant Nanocapsule with a Linear Carbide Cluster, *ACS Nano*. 2018, **12**, 2065–2069.
- [S2] K. Akiyama, T. Hamano, Y. Nakanishi, E. Takeuchi, S. Noda, Z. Wang, S. Kubuki, H. Shinohara, Non-HPLC Rapid Separation of Metallofullerenes and Empty Cages with  $TiCl_4$  Lewis Acid, *J. Am. Chem. Soc.* 2012, **134**, 9762–9767.
- [S3] G. M. Sheldrick, Crystal Structure Refinement with SHELXL. *Acta Crystallogr. Sect. C Struct. Chem.* 2015, **71**, 3–8.
- [S4] Y. Zhao, D. G. Truhlar, The M06 Suite of Density Functionals for Main Group Thermochemistry, Thermochemical Kinetics, Noncovalent Interactions, Excited States, and Transition Elements: Two New Functionals and Systematic Testing of Four M06-Class Functionals and 12 Other Functionals, *Theor. Chem. Acc.* 2008, **120**, 215–241.
- [S5] W. J. Hehre, R. Ditchfield, J. A. Pople, Self—Consistent Molecular Orbital Methods. XII. Further Extensions of Gaussian—Type Basis Sets for Use in Molecular Orbital Studies of Organic Molecules. *J. Chem. Phys.* 1972, **56**, 2257–2261.
- [S6] X. Cao, M. Dolg, Segmented Contraction Scheme for Small-Core Lanthanide Pseudopotential Basis Sets. *J. Mol. Struct. THEOCHEM.* 2002, **581**, 139–147.
- [S7] M. J. Frisch, G. W. Trucks, H. B. Schlegel, G. E. Scuseria, M. A. Robb, J. R. Cheeseman, G. Scalmani, V. Barone, G. A. Petersson and others, Gaussian 16, Revision C.01. Gaussian, Inc., Wallingford CT, 2019.
